# Supplementary material for: Prevalence of swallow, communication, voice and cognitive compromise following hospitalisation for COVID-19: the PHOSP-COVID analysis
Source: PubMed Central journal article supplement — BMJ Open Respir Res. 2023 Jul 26;10(1):e001647. doi: 10.1136/bmjresp-2023-001647 (PMC10360430; doi:10.1136/bmjresp-2023-001647), 2023-07-26
Supplement: bmjresp-2023-001647supp001.pdf [file bmjresp-2023-001647supp001.pdf]

## **Supplementary data**

### **1.1 Swallow problems**

In addition to age and sex the following variables were included in the final model chosen by cross validation; South Asian ethnicity, Vocational level qualification, having depression or being previously treated by a mental health professional, reporting a COVID symptom of cough, sore throat or runny nose, being overweight, receiving class 6 respiratory support, or receiving anti-biotic therapy during the index admission

### **1.2 Voice problems**

The following variables were selected via the lasso cross validation model; age at admission, sex, IMD quintiles 3 and 4, no or primary only education, depression, previous treatment by a mental health professional, asthma, bronchiectasis, GORD, CKD, infectious disease, recording a COVID symptom of sore throat, not answering the question about loss of taste, being previously on anti-infectives, ACEIs, NSAIDs or not recording NSAID usage, being obese, respiratory class 7-9, no answer as to whether the patient had systemic steroids, being prone, having RRT, a new diagnosis of myocarditis or cardiomyopathy

### **1.3 Communication problems**

Along with age and sex the following variables were included in the final model selected by lasso; South Asian, IMD quintiles, 3,4 and 5, education to undergraduate level, depression, chronic fatigue syndrome, previous treatment by a mental health professional, asthma, liver disease, GORD, diabetes, hypertension, reporting of fever, sore throat and shortness of breath as COVID symptoms, either reporting confusion as a COVID symptom or not answering the question, receiving ACEI, NSAID and not answering the question about receiving antibiotic therapy

### **1.4 Communication problems visit 2**

In addition to sex and age at admission the following variables were selected to be included in the final model; IMD quintile 2, education to secondary school level, sixth form level, undergraduate level, ischaemic heart disease, depression, previous treatment by a mental health professional, asthma, obesity hypoventilation syndrome, GORD, reporting of sore throat or confusion as a COVID symptom, either reporting fever as a COVID symptom or not answering the question, not answering the question about previously receiving immunosuppressants, receiving NSAID, receiving systemic steroids, and not answering the question about being treated via proning

### **1.5 Cognitive issues visit 1**

The following variables were selected by the lasso regression; Black and South Asian ethnicity, primary level, vocational level, undergraduate and postgraduate level education, valvular heart disease, depression, previous treatment with an antibiotic and by a mental health professional, COPD, asthma, osteoarthritis, diabetes, cancer, severe obesity not answering whether sore throat was a COVID symptom, reporting headache as a COVID symptom, previous treatment with ABBS, and not answering whether the patient was prone.

### **1.6 Cognitive issues visit 2**

The lasso model selected the following variables; all minority ethnic groups, IMD quintile 5 and not recorded, post-graduate level education and

unknown education level, valvular heart disease, TIA, depression, chronic fatigue, previous treatment using antidepressant and by a mental health professional, COPD, pleural effusion, osteoarthritis, liver disease, diabetes, hypertension, infectious disease, recording fever, cough or sore throat as a COVID symptom, either reporting shortness of breath as a COVID symptom or not answering the question, not responding to the question about immunosuppression, use of NSAID, being overweight or severely obese, respiratory support class 5 or 7-9, treated with antibiotic therapy, not responding to question about being treated via proning, and requiring RRT

**Table 6 COVID symptoms and treatments pre- and during the index admission split by whether respondents have communication or cognitive issues at visit 1 or visit 2.**

|                                       |                                   | V1 cognitive issues |              |                | V2 cognitive issues |              |                   | V1 communication issues |             |                | V2 communication issues |             |                |
|---------------------------------------|-----------------------------------|---------------------|--------------|----------------|---------------------|--------------|-------------------|-------------------------|-------------|----------------|-------------------------|-------------|----------------|
|                                       |                                   | No                  | Yes          | p-value        | No                  | Yes          | p-value           | No                      | Yes         | p-value        | No                      | Yes         | p-value        |
| COVID symptoms' duration              | median (IQR)*                     | 8 (6-11)            | 8 (6-11)     | p=0.565        | 8 (6-11)            | 8 (6-11)     | p=0.901           | 8 (6-11)                | 8 (6-11)    | p=0.542        | 8 (6-11)                | 8 (5-11)    | p=0.284        |
| COVID symptoms                        | Fever                             | 501 (78.3%)         | 1164 (77.3%) | p=0.633        | 405 (78.5%)         | 906 (78.6%)  | p=0.967           | 1267 (76.5%)            | 398 (81.4%) | <b>p=0.023</b> | 999 (77.6%)             | 315 (81.8%) | p=0.078        |
|                                       | Cough                             | 542 (83.5%)         | 1255 (82.6%) | p=0.592        | 426 (82.7%)         | 965 (82.2%)  | p=0.796           | 1389 (82.9%)            | 408 (82.8%) | p=0.952        | 1075 (81.9%)            | 319 (83.9%) | p=0.365        |
|                                       | Sore throat                       | 63 (11.8%)          | 201 (15.7%)  | <b>p=0.028</b> | 57 (12.8%)          | 158 (16.3%)  | p=0.086           | 184 (13.2%)             | 79 (19.0%)  | <b>p=0.003</b> | 151 (13.8%)             | 64 (20.2%)  | <b>p=0.005</b> |
|                                       | Runny nose                        | 26 (4.9%)           | 88 (7.0%)    | p=0.095        | 32 (7.3%)           | 59 (6.2%)    | p=0.442           | 88 (6.3%)               | 26 (6.4%)   | p=0.951        | 70 (6.4%)               | 21 (6.7%)   | p=0.862        |
|                                       | Ear pain                          | 6 (1.1%)            | 33 (2.6%)    | <b>p=0.045</b> | 6 (1.4%)            | 22 (2.3%)    | p=0.274           | 26 (1.9%)               | 13 (3.2%)   | p=0.101        | 20 (1.8%)               | 8 (2.6%)    | p=0.421        |
|                                       | Fatigue                           | 330 (57.7%)         | 847 (61.8%)  | p=0.093        | 268 (58.4%)         | 655 (62.4%)  | p=0.137           | 881 (58.8%)             | 296 (66.4%) | <b>p=0.004</b> | 705 (60.5%)             | 221 (64.1%) | p=0.229        |
|                                       | Shortness of breath               | 533 (81.5%)         | 1315 (85.8%) | <b>p=0.011</b> | 430 (83.2%)         | 1000 (84.9%) | p=0.370           | 1403 (83.4%)            | 444 (87.9%) | <b>p=0.014</b> | 1104 (84.0%)            | 329 (85.7%) | p=0.431        |
|                                       | Loss of taste                     | 124 (23.2%)         | 316 (24.8%)  | p=0.464        | 100 (22.8%)         | 241 (24.9%)  | p=0.397           | 331 (23.7%)             | 109 (26.5%) | p=0.243        | 259 (23.5%)             | 82 (26.9%)  | p=0.222        |
|                                       | Loss of smell                     | 109 (20.3%)         | 280 (22.0%)  | p=0.417        | 92 (20.9%)          | 209 (21.7%)  | p=0.751           | 297 (21.2%)             | 92 (22.5%)  | p=0.575        | 233 (21.1%)             | 68 (22.4%)  | p=0.615        |
|                                       | Headache                          | 146 (25.9%)         | 388 (29.7%)  | p=0.095        | 110 (24.2%)         | 288 (28.9%)  | p=0.060           | 400 (27.7%)             | 134 (31.5%) | p=0.125        | 290 (25.7%)             | 108 (33.3%) | <b>p=0.006</b> |
|                                       | Confusion                         | 67 (11.6%)          | 181 (13.3%)  | p=0.310        | 53 (11.5%)          | 153 (14.8%)  | p=0.087           | 171 (11.3%)             | 77 (17.6%)  | <b>p=0.001</b> | 152 (13.1%)             | 54 (16.0%)  | p=0.164        |
| Pre-admission Medications             | Immunosuppressant                 | 58 (9.1%)           | 172 (11.6%)  | p=0.092        | 47 (9.3%)           | 119 (10.5%)  | p=0.450           | 173 (10.6%)             | 57 (11.8%)  | p=0.465        | 129 (10.1%)             | 37 (10.3%)  | p=0.933        |
|                                       | Anti-infectives                   | 65 (10.4%)          | 200 (13.6%)  | <b>p=0.042</b> | 41 (8.2%)           | 162 (14.4%)  | <b>p&lt;0.001</b> | 196 (12.1%)             | 68 (14.1%)  | p=0.249        | 150 (11.8%)             | 55 (15.2%)  | p=0.087        |
|                                       | ACEI                              | 82 (13.0%)          | 228 (15.4%)  | p=0.151        | 67 (13.3%)          | 173 (15.4%)  | p=0.292           | 223 (13.7%)             | 87 (17.9%)  | <b>p=0.022</b> | 186 (14.6%)             | 54 (15.0%)  | p=0.843        |
|                                       | ARBS                              | 32 (5.1%)           | 122 (8.3%)   | p=0.011        | 29 (5.8%)           | 86 (7.6%)    | p=0.190           | 113 (7.0%)              | 41 (8.5%)   | p=0.274        | 91 (7.2%)               | 24 (6.7%)   | p=0.748        |
|                                       | NSAID                             | 35 (5.7%)           | 140 (9.7%)   | <b>p=0.002</b> | 27 (5.5%)           | 105 (9.6%)   | <b>p=0.007</b>    | 120 (7.6%)              | 55 (11.7%)  | <b>p=0.005</b> | 91 (7.4%)               | 41 (11.7%)  | <b>p=0.009</b> |
| Respiratory support                   | Supplemental O2                   | 561 (83.6%)         | 1309 (83.0%) | p=0.727        | 450 (84.7%)         | 1028 (85.1%) | p=0.849           | 1451 (84.1%)            | 420 (80.3%) | <b>p=0.041</b> | 1158 (85.8%)            | 323 (82.4%) | p=0.099        |
|                                       | CPAP                              | 154 (23.7%)         | 424 (27.7%)  | p=0.055        | 121 (23.5%)         | 350 (29.5%)  | <b>p=0.012</b>    | 449 (26.8%)             | 130 (25.7%) | p=0.629        | 354 (26.9%)             | 118 (30.4%) | p=0.174        |
|                                       | Bi-level NIV                      | 18 (2.9%)           | 87 (5.8%)    | <b>p=0.004</b> | 17 (3.4%)           | 62 (5.3%)    | p=0.087           | 74 (4.5%)               | 31 (6.2%)   | p=0.129        | 62 (4.8%)               | 17 (4.5%)   | p=0.810        |
|                                       | High Flow Nasal O2                | 138 (21.6%)         | 330 (21.7%)  | p=0.933        | 108 (21.2%)         | 254 (21.7%)  | p=0.800           | 361 (21.8%)             | 107 (21.4%) | p=0.864        | 284 (21.9%)             | 78 (20.4%)  | p=0.531        |
|                                       | IMV                               | 113 (17.0%)         | 278 (17.7%)  | p=0.683        | 90 (17.0%)          | 231 (19.1%)  | p=0.308           | 293 (17.0%)             | 98 (18.9%)  | p=0.334        | 243 (18.0%)             | 79 (20.1%)  | p=0.359        |
|                                       | ECMO                              | 9 (1.4%)            | 22 (1.4%)    | p=0.942        | 6 (1.2%)            | 13 (1.1%)    | p=0.906           | *                       | *           | *              | *                       | *           | *              |
| Highest respiratory level             | WHO class 3-4                     | 111 (16.4%)         | 270 (16.9%)  | p=0.564        | 81 (15.1%)          | 180 (14.6%)  | p=0.298           | 274 (15.7%)             | 103 (19.5%) | p=0.150        | 193 (14.1%)             | 68 (17.0%)  | p=0.221        |
|                                       | WHO class 5                       | 300 (44.3%)         | 665 (41.6%)  |                | 249 (46.4%)         | 518 (42.1%)  |                   | 759 (43.4%)             | 206 (39.1%) |                | 612 (44.6%)             | 157 (39.3%) |                |
|                                       | WHO class 6                       | 143 (21.1%)         | 375 (23.5%)  |                | 116 (21.6%)         | 295 (24.0%)  |                   | 400 (22.9%)             | 119 (22.6%) |                | 317 (23.1%)             | 94 (23.6%)  |                |
|                                       | WHO Class 7-9                     | 123 (18.2%)         | 288 (18.0%)  |                | 91 (16.9%)          | 238 (19.3%)  |                   | 312 (17.8%)             | 99 (18.8%)  |                | 250 (18.2%)             | 80 (20.1%)  |                |
| Treatments given                      | Antibiotic therapy                | 520 (78.5%)         | 1208 (77.7%) | p=0.642        | 401 (77.0%)         | 959 (79.9%)  | p=0.177           | 1327 (78.2%)            | 398 (76.8%) | p=0.513        | 1063 (79.6%)            | 299 (76.9%) | p=0.250        |
|                                       | Systemic steroids                 | 364 (55.9%)         | 908 (60.1%)  | p=0.070        | 275 (53.5%)         | 681 (58.6%)  | p=0.054           | 984 (59.2%)             | 289 (57.7%) | p=0.535        | 760 (58.3%)             | 198 (52.5%) | <b>p=0.045</b> |
|                                       | Therapeutic dose anti-coagulation | 298 (45.6%)         | 701 (46.4%)  | p=0.736        | 237 (46.3%)         | 554 (47.7%)  | p=0.590           | 757(45.6%)              | 242 (48.1%) | p=0.323        | 611 (47.1%)             | 180 (47.5%) | p=0.895        |
|                                       | Proning                           | 131 (21.2%)         | 276 (19.5%)  | p=0.406        | 100 (20.3%)         | 221 (20.5%)  | p=0.907           | 305 (19.5%)             | 103 (22.1%) | p=0.229        | 249 (20.1%)             | 73 (21.8%)  | p=0.504        |
|                                       | Renal Replacement Therapy         | 25 (3.8%)           | 72 (4.7%)    | p=0.347        | 18 (3.5%)           | 55 (4.7%)    | p=0.258           | 74 (4.4%)               | 23 (4.5%)   | p=0.951        | 57 (4.4%)               | 16 (4.2%)   | p=0.921        |
| Other Diagnoses made during admission | PE/micro thrombi                  | 76 (11.6%)          | 138 (9.0%)   | p=0.064        | 58 (11.3%)          | 108 (9.2%)   | p=0.169           | 169 (10.1%)             | 45 (8.9%)   | p=0.445        | 135 (10.3%)             | 31 (8.1%)   | p=0.202        |
|                                       | Renal failure requiring dialysis  | 19 (2.9%)           | 56(3.7%)     | p=0.381        | 26 (5.0%)           | 43 (3.7%)    | p=0.186           | 54 (3.2%)               | 21 (4.2%)   | p=0.305        | 53 (4.0%)               | 16 (4.2%)   | p=0.876        |
| Admitted to ICU <sup>2</sup>          |                                   | 219 (32.9%)         | 547 (34.9%)  | p=0.365        | 190 (35.8%)         | 465 (38.3%)  | p=0.337           | 570 (33.2%)             | 195 (37.6%) | p=0.063        | 490 (36.2%)             | 166 (42.0%) | <b>p=0.037</b> |
| Duration of Stay                      | Median(IQR)*                      | 8 (4-14)            | 8 (4-16)     | p=0.253        | 7 (4-14)            | 8 (4-17)     | <b>p=0.007</b>    | 8 (4-16)                | 8 (4-17)    | p=0.287        | 8 (4-16)                | 8 (4-18)    | p=0.558        |

Unless otherwise specified numbers are shown as counts (percentages) and p-values have been calculated using Chi-squared test. <sup>1</sup>This is the duration in days of COVID symptoms for patients who had COVID prior to admission. <sup>2</sup>This information is only available from Tier 2 respondents at either of the follow-up visits for patients who completed the PSQ. <sup>3</sup>The denominators vary for most variables, the number of excluded records due to missing data are recorded in supplementary Table s1. \*p-value calculated using Kruskal Wallis, p-values <0.05 are bolded. ACEI =Angiotensin-Converting Enzyme Inhibitors, ARBS = Angiotensin II Receptor Blockers, NSAID = Non-Steroidal Anti-Inflammatory Drugs , CPAP= Continuous Positive Airway Pressure, NIV =Non-Invasive Ventilation, ECMO = Extra Corporeal Membrane Oxygenation, WHO =World Health Organisation

**Table 7 Outcomes reported during the same visit**

|                                                   |                              | V1 cognitive issues |             |                   | V2 cognitive issues |             |                   | V1 communication issues |             |                   | V2 communication issues |              |                   |
|---------------------------------------------------|------------------------------|---------------------|-------------|-------------------|---------------------|-------------|-------------------|-------------------------|-------------|-------------------|-------------------------|--------------|-------------------|
|                                                   |                              | No                  | Yes         | p-value           | No                  | Yes         | p-value           | No                      | Yes         | p-value           | No                      | Yes          | p-value           |
| EQ-5D-5L                                          |                              |                     |             |                   |                     |             |                   |                         |             |                   |                         |              |                   |
| Mobility                                          | Improved                     | 30 (6.1%)           | 98 (8.7%)   |                   | 28 (6.7%)           | 92 (9.7%)   |                   | 100 (8.0%)              | 28 (7.5%)   |                   | 95 (8.9%)               | 25 (8.2%)    |                   |
|                                                   | Stayed the Same              | 382 (78.3%)         | 562 (49.6%) | <b>p&lt;0.001</b> | 330 (79.3%)         | 493 (52.0%) | <b>p&lt;0.001</b> | 793 (63.5%)             | 152 (41.0%) | <b>p&lt;0.001</b> | 695 (65.4%)             | 129 (42.4%)  | <b>p&lt;0.001</b> |
|                                                   | Worsened                     | 76 (15.6%)          | 472 (41.7%) |                   | 58 (13.9%)          | 363 (38.3%) |                   | 356 (28.5%)             | 191 (51.5%) |                   | 272 (25.6%)             | 150 (49.3%)  |                   |
| Self-care ^                                       | Improved                     | *                   | *           |                   | *                   | *           |                   | 15 (1.2%)               | 7 (1.9%)    |                   | 13 (1.2%)               | 7 (2.3%)     |                   |
|                                                   | Stayed the Same              | 370 (76.0%)         | 480 (42.5%) | <b>p&lt;0.001</b> | 325 (78.3%)         | 430 (45.4%) | <b>p&lt;0.001</b> | 728 (58.4%)             | 126 (34.1%) | <b>p&lt;0.001</b> | 641 (60.4%)             | 116 (38.2%)  | <b>p&lt;0.001</b> |
|                                                   | Worsened                     | 110 (22.6%)         | 630 (55.8%) |                   | 85 (20.5%)          | 500 (52.7%) |                   | 503 (40.4%)             | 237(64.1%)  |                   | 704 (66.4%)             | 181 (59.5%)  |                   |
| Usual Activities                                  | Improved                     | 21 (4.3%)           | 77 (6.8%)   |                   | 19 (4.6%)           | 64 (6.7%)   |                   | 72 (5.8%)               | 26 (7.0%)   |                   | 63 (5.9%)               | 20 (6.6%)    |                   |
|                                                   | Stayed the Same              | 367 (75.4%)         | 503 (44.5%) | <b>p&lt;0.001</b> | 320 (77.1%)         | 447 (47.1%) | <b>p&lt;0.001</b> | 737 (59.1%)             | 134 (36.1%) | <b>p&lt;0.001</b> | 648 (61.0%)             | 120(39.5%)   | <b>p&lt;0.001</b> |
|                                                   | Worsened                     | 99 (20.3%)          | 551 (48.7%) |                   | 76 (18.3%)          | 438 (46.2%) |                   | 438 (35.1%)             | 211 (56.9%) |                   | 351 (33.1%)             | 164 (53.9%)  |                   |
| Pain/Discomfort                                   | Improved                     | 94 (19.4%)          | 268 (23.7%) |                   | 88 (21.2%)          | 253 (26.7%) |                   | 287 (23.0%)             | 75 (20.3%)  |                   | 272 (25.6%)             | 70 (23.0%)   |                   |
|                                                   | Stayed the Same              | 329 (67.8%)         | 470 (41.6%) | <b>p&lt;0.001</b> | 275 (66.3%)         | 383 (40.4%) | <b>p&lt;0.001</b> | 654 (52.5%)             | 146 (39.5%) | <b>p&lt;0.001</b> | 548 (51.6%)             | 110 (36.2%)  | <b>p&lt;0.001</b> |
|                                                   | Worsened                     | 62 (12.8%)          | 393 (34.8%) |                   | 52 (12.5%)          | 313 (33.0%) |                   | 305 (24.5%)             | 149 (40.3%) |                   | 242 (22.8%)             | 124 (40.8%)  |                   |
| Anxiety /Depression                               | Improved                     | 52 (10.6%)          | 179 (15.9%) |                   | 50 (12.0%)          | 139 (14.7%) |                   | 173 (13.9%)             | 58 (15.6%)  |                   | 140 (13.2%)             | 49 (16.2%)   |                   |
|                                                   | Stayed the Same              | 337 (68.9%)         | 432 (38.3%) | <b>p&lt;0.001</b> | 290 (69.9%)         | 389 (41.1%) | <b>p&lt;0.001</b> | 638 (51.2%)             | 132 (35.6%) | <b>p&lt;0.001</b> | 577 (54.4%)             | 104 (34.3%)  | <b>p&lt;0.001</b> |
|                                                   | Worsened                     | 100 (20.4%)         | 518 (45.9%) |                   | 75 (18.1%)          | 419 (44.3%) |                   | 436 (35.0%)             | 181 (48.8%) |                   | 344 (32.4%)             | 150 (49.5%)  |                   |
| Summary - How good or bad is your health overall? | Current - score <sup>x</sup> | 80 (70-90)          | 70 (50-80)  | <b>p&lt;0.001</b> | 85 (75-90)          | 70 (50-80)  | <b>p&lt;0.001</b> | 79 (60-90)              | 60 (45-77)  | <b>p&lt;0.001</b> | 80 (62-90)              | 60 (45-79)   | <b>p&lt;0.001</b> |
|                                                   | Improved                     | 79 (17.1%)          | 165 (15.4%) |                   | 90 (22.7%)          | 165 (18.4%) |                   | 185 (15.7%)             | 59(16.7%)   |                   | 204 (20.1%)             | 51 (18.0%)   |                   |
|                                                   | Stayed the Same              | 144 (31.2%)         | 216 (20.1%) | <b>p&lt;0.001</b> | 107 (27.0%)         | 128 (14.2%) | <b>p&lt;0.001</b> | 315 (26.7%)             | 45 (12.7%)  | <b>p&lt;0.001</b> | 206 (20.3%)             | 29 (10.2%)   | <b>p&lt;0.001</b> |
|                                                   | Worsened                     | 239 (51.7%)         | 693 (64.6%) |                   | 199 (50.3%)         | 606 (67.4%) |                   | 682 (57.8%)             | 250 (70.6%) |                   | 603 (59.5%)             | 204 (71.8%)  |                   |
| MRC Dyspnoea Scale                                | Improved                     | 26 (10.9%)          | 47 (6.6%)   |                   | 11 (11.8%)          | 27 (9.4%)   |                   | 59 (8.5%)               | 14 (5.4%)   |                   | 27 (8.9%)               | 11(14.5%)    |                   |
|                                                   | Stayed the Same              | 124 (51.9%)         | 255 (35.6%) | <b>p&lt;0.001</b> | 61 (65.6%)          | 119 (41.5%) | <b>p&lt;0.001</b> | 291 (41.9%)             | 88 (33.7%)  | <b>p=0.006</b>    | 158 (52.0%)             | 22 (28.9%)   | <b>p&lt;0.001</b> |
|                                                   | Worsened                     | 88 (36.8%)          | 415 (57.9%) |                   | 21 (22.6%)          | 141 (49.1%) |                   | 344 (49.6%)             | 159 (60.9%) |                   | 119 (39.1%)             | 43 (56.6%)   |                   |
| Dyspnoea 12 <sup>x</sup>                          | Overall score                | 0 (0-3)             | 5 (1-13)    | <b>p&lt;0.001</b> | 0 (0-2)             | 4 (1-11)    | <b>p&lt;0.001</b> | 2 (0-7)                 | 9 (3-17)    | <b>p&lt;0.001</b> | 1 (0-6)                 | 7 (2-17)     | <b>p&lt;0.001</b> |
|                                                   | Physical domain              | 0 (0-2)             | 4 (1-9)     | <b>p&lt;0.001</b> | 0 (0-1)             | 4 (1-8)     | <b>p&lt;0.001</b> | 2 (0-6)                 | 6 (2-11)    | <b>p&lt;0.001</b> | 1 (0-5)                 | 6 (2-11)     | <b>p&lt;0.001</b> |
|                                                   | Affective domain             | 0 (0-0)             | 0 (0-4)     | <b>p&lt;0.001</b> | 0 (0-0)             | 0 (0-3)     | <b>p&lt;0.001</b> | 0 (0-1)                 | 2 (0-6)     | <b>p&lt;0.001</b> | 0 (0-1)                 | 1 (0-6)      | <b>p&lt;0.001</b> |
| PCL-5                                             | Overall score <sup>x</sup>   | 3 (0-8)             | 14 (5-30)   | <b>p&lt;0.001</b> | 1 (0-5)             | 12 (4-28)   | <b>p&lt;0.001</b> | 7 (2-17)                | 25 (12-43)  | <b>p&lt;0.001</b> | 5 (1-14)                | 23 (9-43)    | <b>p&lt;0.001</b> |
|                                                   | Overall Score >32            | 23 (4.9%)           | 332 (22.0%) | <b>p&lt;0.001</b> | 11 (3.2%)           | 222 (19.5%) | <b>p&lt;0.001</b> | 167 (11.5%)             | 188 (36.1%) | <b>p&lt;0.001</b> | 101 (9.2%)              | 132 (34.3%)  | <b>p&lt;0.001</b> |
| MOCA <sup>1</sup>                                 | Overall Score <sup>x</sup>   | 27 (24-28)          | 26 (24-28)  | <b>p=0.014</b>    | 28 (25-29)          | 27 (25-28)  | <b>p&lt;0.001</b> | 26 (24-28)              | 26 (23-28)  | <b>p&lt;0.001</b> | 27 (25-29)              | 27 (24.5-28) | <b>p=0.016</b>    |
|                                                   | Normal function              | 329 (63.9%)         | 768 (59.8%) |                   | 317 (74.8%)         | 667 (67.5%) |                   | 873 (63.2%)             | 225 (53.8%) |                   | 762 (70.4%)             | 223 (67.2%)  |                   |
|                                                   | Mild impairment              | 177 (34.4%)         | 470 (36.6%) | p=0.062           | 97 (22.9%)          | 295 (29.9%) | <b>p=0.023</b>    | 471 (34.1%)             | 175 (41.9%) | <b>p=0.002</b>    | 295 (27.2%)             | 99 (29.8%)   | p=0.509           |
|                                                   | Moderate/severe impairment   | 9 (1.7%)            | 46 (3.6%)   |                   | 10 (2.4%)           | 26 (2.6%)   |                   | 37 (2.7%)               | 18 (4.3%)   |                   | 26 (2.5%)               | 10 (3.0%)    |                   |
| RCF <sup>2</sup>                                  | Frail                        | 11 (1.8%)           | 115 (8.0%)  | <b>p&lt;0.001</b> | 7 (1.5%)            | 77 (6.9%)   | <b>p&lt;0.001</b> | 69 (4.4%)               | 57 (12.2%)  | <b>p&lt;0.001</b> | 43 (3.5%)               | 41 (11.4%)   | <b>p&lt;0.001</b> |

Outcomes taken from the same visit as reported visit or swallow problems. Unless otherwise specified numbers are reported as count (percentage) and p-values are the result of a Chi-square test. p-values <0.05 are bolded. <sup>x</sup> are shown as median (IQR) and Kruskal Wallis test is used. <sup>1</sup>Normal cognitive function score > 25, mild cognitive impairment score 18-25, moderate or



|                                         |           |            |                   |           |            |                   |            |           |                   |            |           |                |
|-----------------------------------------|-----------|------------|-------------------|-----------|------------|-------------------|------------|-----------|-------------------|------------|-----------|----------------|
| Hyperthyroidism                         | 7 (1.0%)  | 16 (1.0%)  | p=0.943           | 8 (1.5%)  | 10 (0.8%)  | p=0.192           | 15 (0.9%)  | 8 (1.5%)  | p=0.184           | *          | *         | *              |
| Chronic Kidney Disease (Any Stage)      | 29 (4.3%) | 84 (5.3%)  | p=0.329           | 22 (4.1%) | 61 (5.0%)  | p=0.433           | 85 (4.9%)  | 28 (5.3%) | p=0.677           | 63 (4.6%)  | 20 (5.0%) | p=0.726        |
| Cancer                                  | 58 (8.6%) | 106 (6.6%) | p=0.103           | 41 (7.6%) | 101 (8.2%) | p=0.685           | 135 (7.7%) | 29 (5.5%) | p=0.084           | 108 (7.9%) | 35 (8.8%) | p=0.561        |
| Infectious Disease                      | 16 (2.4%) | 37 (2.3%)  | p=0.945           | 15 (2.8%) | 25(2.0%)   | p=0.321           | 43 (2.5%)  | 10 (1.9%) | p=0.453           | 34 (2.5%)  | 6 (1.5%)  | p=0.249        |
| Number of co-morbidities – Median (IQR) | 1 (0-3)   | 2 (1-3)    | <b>p&lt;0.001</b> | 1 (0-2)   | 2 (1-3)    | <b>p&lt;0.001</b> | 2 (1-3)    | 2 (1-4)   | <b>p&lt;0.001</b> | 2 (1-3)    | 2 (1-4)   | <b>p=0.003</b> |

Unless otherwise specified numbers are shown as counts (percentages) and p-values have been calculated using Chi-squared test. \* numbers ≤5 have been suppressed, p-values <0.05 are bolded.

### Supplementary Table S1- Number of respondents who did not answer questions on Symptoms, previous treatments or events during index admissions

|                                       | ICU Swallow |     | ICU Voice |     | Cognitive issues – V1 |      | Cognitive issues – V2 |      | Communication issues – V1 |     | Communication issue – V2s |     |
|---------------------------------------|-------------|-----|-----------|-----|-----------------------|------|-----------------------|------|---------------------------|-----|---------------------------|-----|
|                                       | No          | Yes | No        | Yes | No                    | Yes  | No                    | Yes  | No                        | Yes | No                        | Yes |
| N                                     | 767         | 188 | 627       | 319 | 677                   | 1598 | 537                   | 1231 | 1748                      | 527 | 1372                      | 399 |
| Symptom Duration                      | 91          | 28  | 67        | 50  | 75                    | 174  | 64                    | 118  | 194                       | 55  | 143                       | 39  |
| Fever                                 | 52          | 19  | 33        | 37  | 37                    | 93   | 21                    | 79   | 92                        | 38  | 85                        | 14  |
| Cough                                 | 51          | 22  | 33        | 40  | 28                    | 79   | 22                    | 57   | 73                        | 34  | 60                        | 19  |
| Sore throat                           | 184         | 48  | 133       | 93  | 141                   | 321  | 92                    | 264  | 352                       | 112 | 274                       | 82  |
| Runny nose                            | 181         | 51  | 130       | 96  | 144                   | 340  | 96                    | 275  | 361                       | 122 | 284                       | 87  |
| Shortness of breath                   | 45          | 17  | 35        | 28  | 23                    | 66   | 20                    | 53   | 66                        | 22  | 58                        | 15  |
| Loss of taste                         | 207         | 50  | 144       | 107 | 143                   | 326  | 99                    | 265  | 354                       | 116 | 270                       | 94  |
| Loss of smell                         | 203         | 53  | 145       | 105 | 140                   | 328  | 97                    | 267  | 349                       | 118 | 268                       | 96  |
| Headache                              | 170         | 50  | 123       | 92  | 114                   | 293  | 82                    | 236  | 306                       | 102 | 242                       | 75  |
| Confusion                             | 141         | 40  | 100       | 76  | 98                    | 234  | 75                    | 196  | 241                       | 89  | 208                       | 62  |
| Immunosuppressant                     | 90          | 29  | 63        | 55  | 42                    | 118  | 33                    | 103  | 116                       | 43  | 98                        | 39  |
| Anti-infectives                       | 85          | 32  | 62        | 56  | 49                    | 124  | 38                    | 105  | 129                       | 44  | 106                       | 38  |
| ACEI                                  | 89          | 26  | 61        | 53  | 47                    | 121  | 35                    | 104  | 125                       | 42  | 100                       | 40  |
| ABBS                                  | 92          | 28  | 64        | 55  | 51                    | 125  | 39                    | 104  | 132                       | 43  | 104                       | 40  |
| NSAID                                 | 103         | 34  | 71        | 65  | 60                    | 161  | 47                    | 134  | 165                       | 55  | 134                       | 48  |
| Supplemental O2                       | *           | *   | 9         | 10  | 6                     | 20   | 6                     | 23   | *                         | *   | 22                        | 7   |
| Continuous Positive Airway Pressure   | 50          | 16  | 31        | 35  | 27                    | 65   | 23                    | 44   | 71                        | 21  | 56                        | 11  |
| Bi-level Non-Invasive Ventilation     | 80          | 24  | 58        | 45  | 46                    | 89   | 34                    | 66   | 109                       | 26  | 79                        | 21  |
| High Flow Nasal O2                    | 72          | 25  | 48        | 48  | 37                    | 79   | 27                    | 63   | 89                        | 27  | 73                        | 17  |
| Invasive Mechanical Ventilation       | *           | *   | 7         | 9   | 11                    | 25   | 8                     | 20   | 28                        | 8   | *                         | *   |
| Extra-Corporeal Membrane Oxygenation* | 42          | 14  | 26        | 29  | 24                    | 45   | 19                    | 42   | 55                        | 15  | 50                        | 10  |
| Antibiotic therapy                    | 31          | 7   | 23        | 15  | 15                    | 44   | 16                    | 30   | 50                        | 9   | 36                        | 10  |
| Systemic (oral or IV) steroids        | 66          | 24  | 46        | 43  | 26                    | 86   | 23                    | 68   | 86                        | 26  | 69                        | 22  |
| Therapeutic dose anti-coagulation     | 61          | 23  | 45        | 39  | 24                    | 88   | 25                    | 70   | 88                        | 24  | 75                        | 20  |
| Proning                               | 97          | 35  | 71        | 60  | 58                    | 186  | 44                    | 155  | 184                       | 60  | 135                       | 64  |
| Renal Replacement Therapy             | 58          | 20  | 38        | 40  | 21                    | 71   | 21                    | 63   | 77                        | 15  | 62                        | 22  |
| Pulmonary embolism/micro thrombi      | 43          | 16  | 28        | 31  | 23                    | 73   | 25                    | 53   | 73                        | 23  | 61                        | 17  |
| Renal failure requiring dialysis      | 44          | 18  | 31        | 31  | 25                    | 68   | 21                    | 56   | 68                        | 23  | 57                        | 20  |
| ITU admission                         | N/a         | N/a | N/a       | N/a | 11                    | 30   | 7                     | 16   | 32                        | 9   | *                         | *   |

\*Numbers less than 5 have been suppressed, where values suppressed could be calculated from other values (including those cross-referenced to other tables), other values have been rounded to the nearest 5

### Supplementary Table S2- Number of respondents who did not answer questions on outcomes at the follow-up research visits

|                  | ICU Swallow – v1 |     | ICU Swallow – v2 |     | ICU Voice – v1 |     | ICU Voice – v2 |     | Communication issues – V1 |      | Cognitive issues- V2 |     | Communication issue – V2s |      |
|------------------|------------------|-----|------------------|-----|----------------|-----|----------------|-----|---------------------------|------|----------------------|-----|---------------------------|------|
|                  | No               | Yes | No               | Yes | No             | Yes | No             | Yes | No                        | Yes  | No                   | Yes | No                        | Yes  |
| N                | 767              | 188 | 767              | 188 | 627            | 319 | 627            | 319 | 677                       | 1598 | 1748                 | 527 | 537                       | 1231 |
| Mobility         | 257              | 49  | 315              | 79  | 219            | 85  | 276            | 112 | 189                       | 466  | 500                  | 156 | 121                       | 283  |
| Self-care        | 257              | 49  | 246              | 59  | 218            | 86  | 275            | 112 | 190                       | 470  | 502                  | 157 | 120                       | 285  |
| Usual Activities | 257              | 49  | 246              | 59  | 218            | 86  | 275            | 112 | 190                       | 467  | 502                  | 156 | 122                       | 282  |

|                    |     |     |     |     |     |     |     |     |     |     |      |     |     |     |
|--------------------|-----|-----|-----|-----|-----|-----|-----|-----|-----|-----|------|-----|-----|-----|
| Pain/Discomfort    | 258 | 49  | 246 | 59  | 219 | 86  | 275 | 112 | 192 | 469 | 503  | 157 | 122 | 283 |
| Anxiety/Depression | 258 | 49  | 247 | 59  | 218 | 87  | 275 | 113 | 188 | 470 | 503  | 156 | 122 | 285 |
| Summary            | 274 | 57  | 262 | 67  | 230 | 99  | 288 | 123 | 215 | 526 | 568  | 173 | 141 | 332 |
| MRC Dyspnoea Scale | 516 | 105 | 676 | 151 | 432 | 184 | 554 | 262 | 438 | 881 | 1054 | 266 | 444 | 944 |
| Dyspnoea 12        | 101 | 20  | 225 | 59  | 92  | 13  | 89  | 74  | 45  | 166 | 156  | 57  | 40  | 115 |
| PCL-5              | 98  | 8   | 216 | 56  | 88  | 28  | 89  | 75  | 207 | 92  | 294  | 6   | 192 | 93  |
| MOCA               | 201 | 43  | 286 | 66  | 165 | 79  | 241 | 104 | 162 | 314 | 367  | 109 | 113 | 243 |
| RCF                | 111 | 31  | 197 | 50  | 99  | 52  | 175 | 66  | 80  | 169 | 189  | 60  | 55  | 112 |
